# Supplementary material for: Significant signal enhancement of dielectric barrier discharge plasma induced vapor generation by using non-ionic surfactants for determination of mercury and cadmium by atomic fluorescence spectrometry
Source: Royal Society of Chemistry journal article supplement (doi:10.1039/c5ja00300h), 2015-09-22

1

## Supporting Information

2 **Table S1.** Operating parameters for NIS-enhanced DBD plasma-CVG-AFS

| Parameter of DBD plasma-CVG-AFS<br>(Hg)                | Description | Parameter of DBD plasma-CVG-AFS<br>(Cd)               | Description |
|--------------------------------------------------------|-------------|-------------------------------------------------------|-------------|
| Lamp current (mA)                                      | 30          | Lamp current (mA)                                     | 60          |
| Photomultiplier voltage (V)                            | 280         | Photomultiplier voltage (V)                           | 290         |
| Atomizer observation height (mm)                       | 10          | Atomizer observation height (mm)                      | 10          |
| Flow rate of the shielding gas (mL min <sup>-1</sup> ) | 900         | Flow rate of the shielding gas (L min <sup>-1</sup> ) | 900         |
| Read mode                                              | Peak height | Read mode                                             | Peak height |
| Sample flow rate (mL min <sup>-1</sup> )               | 3.0         | Sample flow rate (mL min <sup>-1</sup> )              | 3.7         |
| Sample loop (μL)                                       | 300         | Sample loop (μL)                                      | 300         |
| Discharge gas flow rate (mL min <sup>-1</sup> )        | 200         | Discharge gas flow rate (mL min <sup>-1</sup> )       | 400         |
| Discharge power (W)                                    | 25          | Discharge power (W)                                   | 25          |
| pH                                                     | 5           | pH                                                    | 7           |
| Hydrogen flow rate (mL min <sup>-1</sup> )             | 0           | Hydrogen flow rate (mL min <sup>-1</sup> )            | 60          |

3

4 **Fig. S1.** Effect of Triton X-114/Tween-20 concentration on the fluorescence  
5 intensities of Cd and Hg (1 μg L<sup>-1</sup> each). (Cd Ar flow rate: 400 mL min<sup>-1</sup>, sample flow  
6 rate: 3.0 mL min<sup>-1</sup>, hydrogen flow rate: 50 mL min<sup>-1</sup>, pH: 7; Hg Ar flow rate: 300 mL  
7 min<sup>-1</sup>, sample flow rate: 3.0 mL min<sup>-1</sup>, pH: 5). Error bars in the figure represent  
8 standard deviations of the results (n=5).

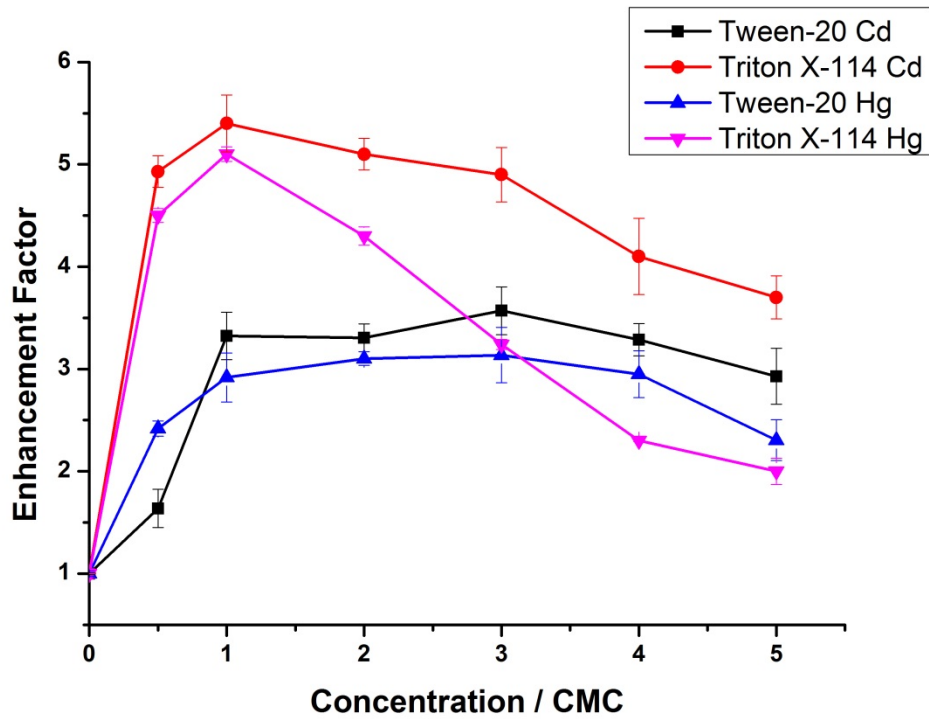

9

10 **Fig. S2.** Effect of Triton X-114/Tween-20 concentration on the surface tensions. Error

11 bars in the figure represent standard deviations of the results (n=5).

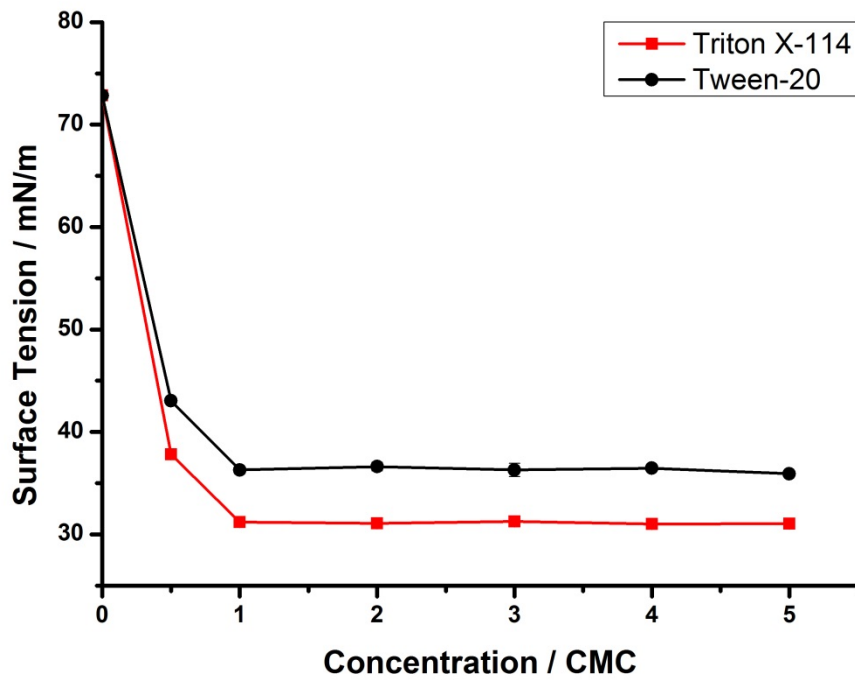

12

13 **Fig. S3.** Temporal fluorescence signals of Cd ( $1\mu\text{g L}^{-1}$ ) with the heated QTA atomizer

14 and the QTA atomizer unheated. (A) Without Triton X-114; (B) With  $1 \times \text{CMC}$  of  
15 Triton X-114. (A Ar flow rate:  $500 \text{ mL min}^{-1}$ , sample flow rate:  $4.5 \text{ mL min}^{-1}$ ,  
16 hydrogen flow rate:  $50 \text{ mL min}^{-1}$ , pH: 7; B Ar flow rate:  $400 \text{ mL min}^{-1}$ , sample flow  
17 rate:  $3.7 \text{ mL min}^{-1}$ , hydrogen flow rate:  $60 \text{ mL min}^{-1}$ , pH: 7).

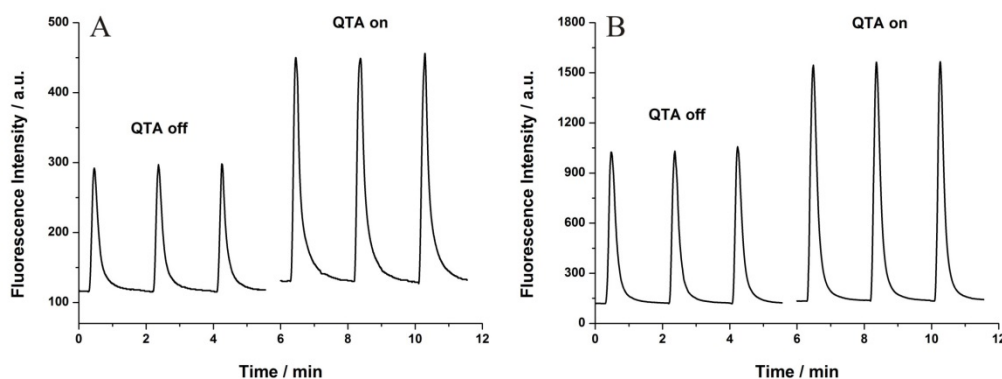

18

19 **Fig. S4.** A. Effect of Ar flow rate on the fluorescence signals of Cd and Hg ( $1 \mu\text{g L}^{-1}$   
20 each), (Cd sample flow rate:  $3.0 \text{ mL min}^{-1}$ , hydrogen flow rate:  $50 \text{ mL min}^{-1}$ , pH: 7;  
21 Hg sample flow rate:  $3.0 \text{ mL min}^{-1}$ , pH: 5) B. Effect of H<sub>2</sub> flow rate on the  
22 fluorescence signals of Cd ( $1 \mu\text{g L}^{-1}$ ), (Cd Ar flow rate:  $400 \text{ mL min}^{-1}$ , sample flow  
23 rate:  $3.0 \text{ mL min}^{-1}$ , pH: 7); C. Effect of sample flow rate on the fluorescence signals  
24 of Cd and Hg ( $1 \mu\text{g L}^{-1}$  each) (Cd Ar flow rate:  $400 \text{ mL min}^{-1}$ , hydrogen flow rate:  $60$   
25  $\text{mL min}^{-1}$ , pH: 7; Hg Ar flow rate:  $200 \text{ mL min}^{-1}$ , pH: 5). Error bars in the figure  
26 represent standard deviations of the results (n=5).

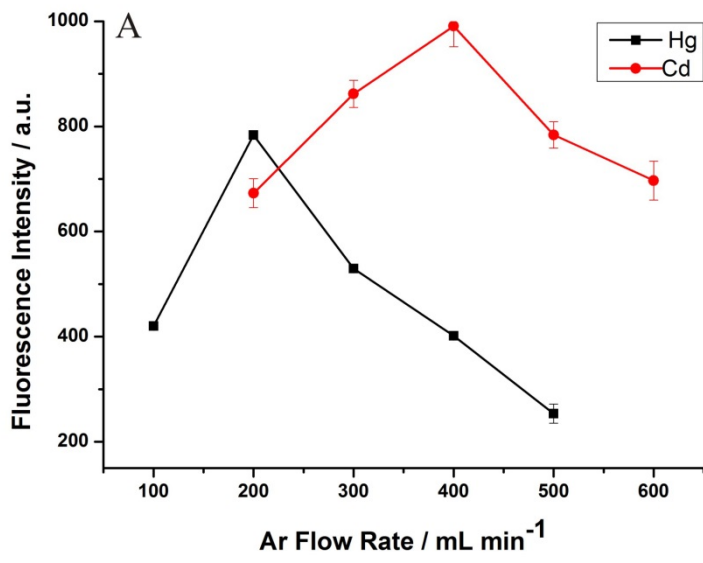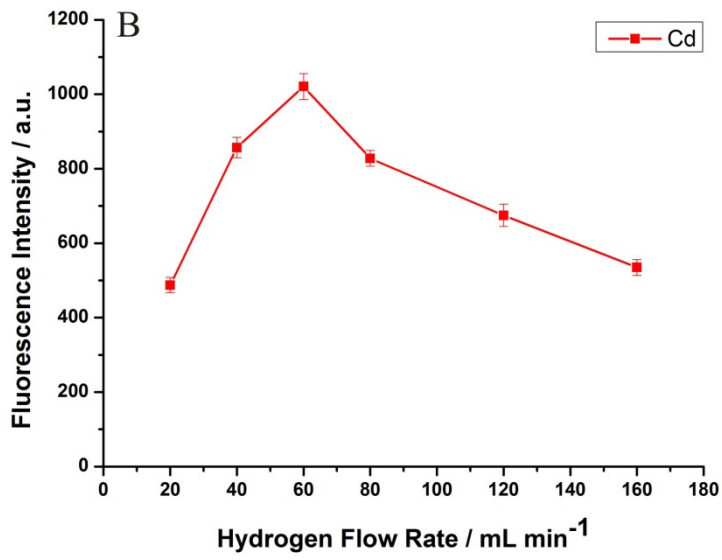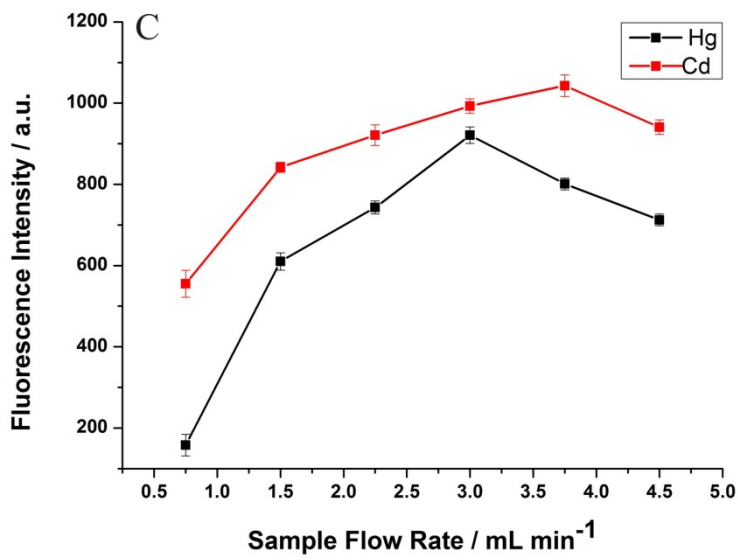

Supplement: c5ja00300h1.pdf [file c5ja00300h1.pdf]
